## CORRECTION

# Reconstruction of phrenic neuron identity in embryonic stem cell-derived motor neurons

**Carolina Barcellos Machado, Kevin C. Kanning, Patricia Kreis, Danielle Stevenson, Martin Crossley, Magdalena Nowak, Michelina Iacovino, Michael Kyba, David Chambers, Eric Blanc and Ivo Lieberam**

There was an error published in *Development* **141**, 784-794.

In the supplementary data originally published, the supplementary Materials and methods section was missing. The correct version now appears online.

We apologise to the authors and readers for this mistake.
